# Supplementary material for: Unraveling the Binding Mechanism of Alzheimer’s Drugs with Irisin: Spectroscopic, Calorimetric, and Computational Approaches
Source: MDPI journal article supplement (doi:10.3390/ijms23115965), 2022-05-25
Supplement: s1 [file s1]

*Supplementary File*

# **Unraveling the Binding Mechanism of Alzheimer's Drugs with Irisin: Spectroscopic, Calorimetric, and Computational Approaches**

Rashid Waseem<sup>1</sup>, Anas Shamsi<sup>1</sup>, Tanzeel Khan<sup>1</sup>, Md. Imtaiyaz Hassan<sup>1</sup>, Syed Naqui Kazim<sup>1</sup>,  
Mohammad Shahid<sup>2</sup>, and Asimul Islam<sup>1\*</sup>

<sup>1</sup>Centre for Interdisciplinary Research in Basic Sciences, Jamia Millia Islamia, New Delhi.

Email: [rashid.waseem439@gmail.com](mailto:rashid.waseem439@gmail.com); [anas.shamsi18@gmail.com](mailto:anas.shamsi18@gmail.com); [aligbcb11@gmail.com](mailto:aligbcb11@gmail.com);  
[mi Hassan@jmi.ac.in](mailto:mi Hassan@jmi.ac.in); [snkazim@gmail.com](mailto:snkazim@gmail.com); [aislam@jmi.ac.in](mailto:aislam@jmi.ac.in)

<sup>2</sup>Department of Basic Medical Sciences, College of Medicine, Prince Sattam Bin Abdulaziz  
University, Al-Kharj 11942, Saudi Arabia. Email: [dr.shahid90@yahoo.com](mailto:dr.shahid90@yahoo.com)

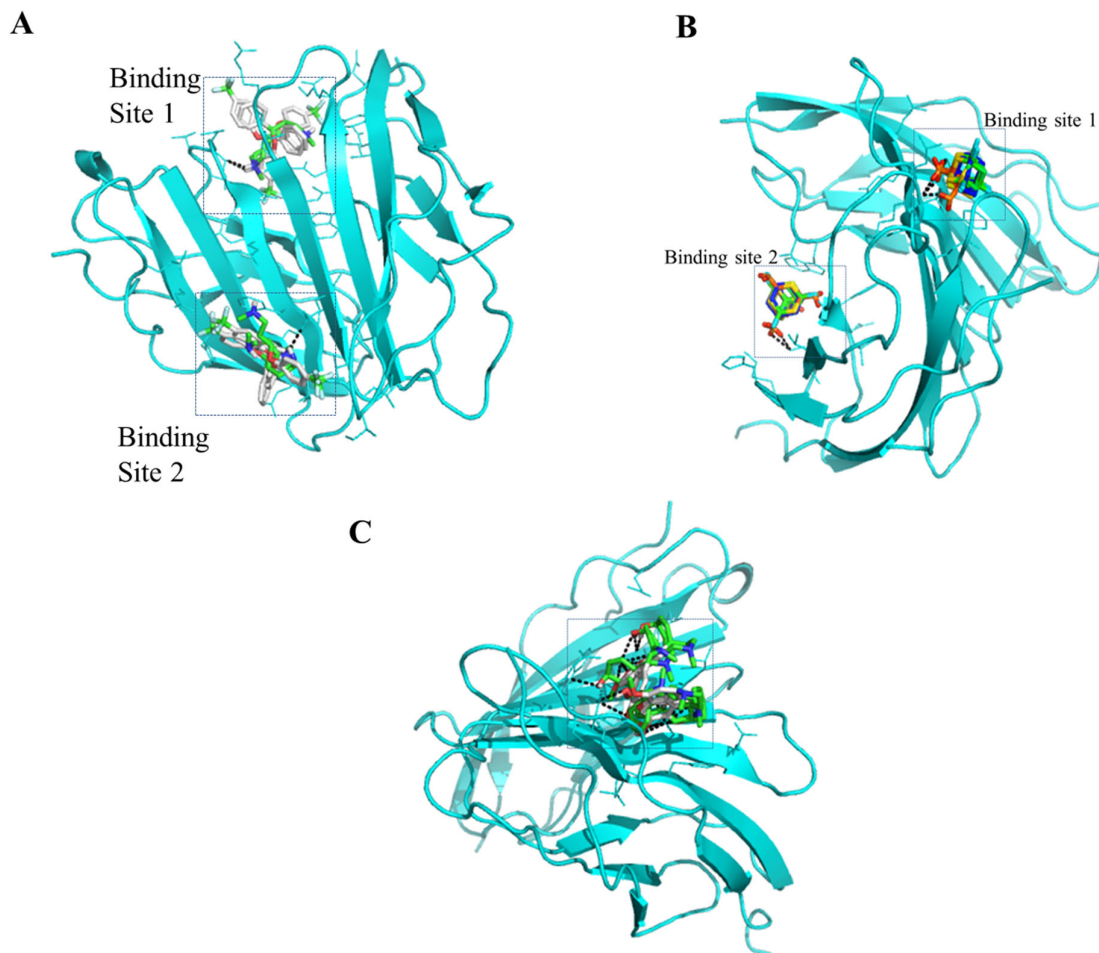

**Figure S1:** (A) Cartoon representation showing the two different binding sites of irisin for fluoxetine. (B) Cartoon representation showing the two different binding sites of irisin for memantine. (C) Cartoon representation showing the binding site of irisin for galantamine.

**A**

| Mode | Affinity<br>(kcal/mol) |
|------|------------------------|
| 1    | -5.6                   |
| 2    | -5.6                   |
| 3    | -5.6                   |
| 4    | -5.3                   |
| 5    | -5.2                   |
| 6    | -5.1                   |
| 7    | -5.1                   |
| 8    | -5.0                   |
| 9    | -5.0                   |

**B**

| Mode | Affinity<br>(kcal/mol) |
|------|------------------------|
| 1    | -5.7                   |
| 2    | -5.4                   |
| 3    | -5.4                   |
| 4    | -5.3                   |
| 5    | -5.3                   |
| 6    | -5.2                   |
| 7    | -4.9                   |
| 8    | -4.9                   |
| 9    | -4.8                   |

**C**

| Mode | Affinity<br>(kcal/mol) |
|------|------------------------|
| 1    | -5.6                   |
| 2    | -5.6                   |
| 3    | -5.6                   |
| 4    | -5.3                   |
| 5    | -5.2                   |
| 6    | -5.1                   |
| 7    | -5.1                   |
| 8    | -5.0                   |
| 9    | -5.0                   |

**Table S1.** Possible binding modes of **(A)** Fluoxetine, **(B)** Memantine and **(C)** Galantamine with irisin and their affinity scores.
